# Supplementary material
Source: PubMed Central journal article supplement (PMC3590096)
Supplement: supp_2012.066399_2012.066399.AURELIUS_SUPPL.pdf [file supp_2012.066399_2012.066399.AURELIUS_SUPPL.pdf]

## Remission maintenance in acute myeloid leukemia: impact of functional histamine H<sub>2</sub> receptors expressed by leukemic cells

Johan Aurelius,<sup>1,2</sup> Anna Martner,<sup>1,2</sup> Mats Brune,<sup>3</sup> Lars Palmqvist,<sup>4</sup> Markus Hansson,<sup>5</sup> Kristoffer Hellstrand,<sup>1,2</sup> and Fredrik B. Thorén<sup>1,2</sup>

<sup>1</sup>Sahlgrenska Cancer Center, University of Gothenburg, Sweden; Departments of <sup>2</sup>Infectious Diseases, <sup>3</sup>Hematology, and <sup>4</sup>Clinical Chemistry and Transfusion Medicine, The Sahlgrenska Academy, University of Gothenburg, Sweden; and <sup>5</sup>Department of Hematology, Skåne University Hospital, Sweden

Citation: Aurelius J, Martner A, Brune M, Palmqvist L, Hansson M, Hellstrand K and Thorén FB. Remission maintenance in acute myeloid leukemia: impact of functional histamine H<sub>2</sub> receptors expressed by leukemic cells. *Haematologica* 2012;97(12):1904-1908. doi:10.3324/haematol.2012.066399

### Online Supplementary Appendix

#### Antibodies and reagents

The following anti-human monoclonal antibodies were purchased from BD Biosciences, San Diego, CA, USA: anti-CD33 (clone P67.6, PE-Cy7), anti-CD34 (clone 8G12, PE), anti-CD56 (clone NCAM16, PE-Cy7, APC), anti-CD14 (clone M $\phi$ P9, APC-Cy7), anti CD15 (clone HI98, APC), anti CD4 (clone SK3, FITC), anti CD8 (clone SK1, FITC). Anti-flavocytochrome b558 (gp91phox) (clone 7D5, FITC) and anti-histamine H<sub>2</sub> receptor (polyclonal rabbit IgG) were from MBL International (Woburn, MA, USA). CD14 (clone T $\ddot{u}$ K4, Pacific blue) and goat anti-rabbit (PE-Cy5.5) was from Invitrogen. The following compounds were used: histamine dihydrochloride (HDC), isoluminol and formyl-methionyl-leucyl phenylalanine (fMLF) from SigmaAldrich (St. Louis, MO, USA); Ficoll-Hypaque, Lymphoprep (Nycomed, Oslo, Norway); live/dead fixable violet dead cell stain (Invitrogen); horseradish peroxidase (Boehringer-Mannheim, Mannheim, Germany); ranitidine (GlaxoSmithKline, Solna, Sweden).

Online Supplementary Table S1. Characteristics of blood and bone marrow samples from newly diagnosed acute myeloid leukemia patients.

| Pat. | FAB | Age | Sex | Sample            |
|------|-----|-----|-----|-------------------|
| 1    | M1  | 77  | M   | PBMC <sup>a</sup> |
| 2    | M2  | 62  | F   | PBMC              |
| 3    | M2  | 42  | F   | PBMC              |
| 4    | M2  | 53  | M   | PBMC              |
| 5    | M4  | 61  | M   | PBMC              |
| 6    | M4  | 23  | M   | PBMC              |
| 7    | M4  | 77  | M   | PBMC              |
| 8    | M4  | 60  | F   | PBMC              |
| 9    | M4  | 48  | F   | PBMC              |
| 10   | M5  | 67  | F   | PBMC              |
| 11   | M1  | 67  | M   | BM <sup>b</sup>   |
| 12   | M1  | 21  | F   | BM                |
| 13   | M1  | 63  | F   | BM                |
| 14   | M1  | 69  | F   | BM                |
| 15   | M1  | 63  | F   | BM                |
| 16   | M2  | 65  | M   | BM                |
| 17   | M2  | 66  | M   | BM                |
| 18   | M2  | 65  | M   | BM                |
| 19   | M2  | 39  | M   | BM                |
| 20   | M2  | 75  | M   | BM                |
| 21   | M4  | 73  | M   | BM                |
| 22   | M4  | 64  | M   | BM                |
| 23   | M4  | 69  | M   | BM                |
| 24   | M4  | 77  | F   | BM                |
| 25   | M4  | 77  | F   | BM                |
| 26   | M5b | 34  | F   | BM                |

<sup>a</sup>Peripheral blood mononuclear cells; <sup>b</sup>bone marrow.
