# Supplementary material
Source: PubMed Central journal article supplement (PMC3590096)
Supplement: supp_2012.066399_2012_066399-Contributions.pdf [file supp_2012.066399_2012_066399-Contributions.pdf]

**Manuscript no. HAEMATOL/2012/066399 entitled “Remission maintenance in acute myeloid leukemia: impact of functional histamine H2 receptors expressed by leukemic cells“**

**Authors: Johan Aurelius, Anna Martner, Mats Brune, Lars Palmqvist, Markus Hansson, Kristoffer Hellstrand and Fredrik B. Thorén**

**Information about the contributions of each person named as having participated in the study**

- 1) Guarantor(s)**, i.e., person(s) who is (are) responsible for the integrity of the work as a whole:
- Kristoffer Hellstrand, University of Gothenburg, kristoffer.hellstrand@gu.se
  - Fredrik B. Thorén, University of Gothenburg, fredrik.thoren@microbio.gu.se

According to the International Committee of Medical Journal Editors (ICMJE) ([http://www.icmje.org/ethical\\_1author.html](http://www.icmje.org/ethical_1author.html)): “*Authorship credit should be based on: 1) substantial contributions to conception and design, acquisition of data, or analysis and interpretation of data; 2) drafting the article or revising it critically for important intellectual content; and 3) final approval of the version to be published. Authors should meet conditions 1, 2, and 3 ..... Acquisition of funding, collection of data, or general supervision of the research group alone does not constitute authorship*”.

The guarantors of this manuscript confirm that all persons designated as authors qualify for authorship, and that each author has participated sufficiently in the work to take public responsibility for appropriate portions of the content.

2) Authors who participated in the **conception of the study**: Johan Aurelius, Anna Martner, Kristoffer Hellstrand and Fredrik B. Thorén

3) **Design & Methods**. The following authors were responsible for specific investigations (please detail):

- Lars Palmqvist, Markus Hansson and Mats Brune were responsible for recruiting patients.
- Johan Aurelius, Anna Martner and Fredrik B. Thorén were responsible for phenotypical analysis, in vitro suppression assays and reactive oxygen species measurements
- Johan Aurelius was responsible for confocal microscopy.
- Lars Palmqvist was responsible for FISH analysis

4) **Results**. The following authors were responsible for specific portions of the results, including figures and tables (please indicate the person responsible for each figure and each table):

- Johan Aurelius, Mats Brune, Kristoffer Hellstrand and Fredrik B. Thorén were responsible for Kaplan-Meier plots in figure 1 and data in table 1.
- Johan Aurelius, Anna Martner, Fredrik B Thorén were responsible for figure 2

5) **Writing the manuscript**. The following authors were responsible for writing the manuscript:

- Kristoffer Hellstrand, Fredrik B. Thorén, Johan Aurelius and Anna Martner drafted the manuscript. All authors contributed to the editing of the final version of the manuscript.

6) **Contributors Listed in Acknowledgments**:

Ulla Gingsjö and Jenny Hendel isolated cells from blood and bone marrow samples. EpiCept Corporation provided clinical results from the HDC/IL-2 phase III trial. Harald Anderson, Lund University, Sweden, performed statistical analyses.
